# Supplementary material for: Assessment of Good Practices in Community-Based Interventions for Physical Activity Promotion: Development of a User-Friendly Tool
Source: Int J Environ Res Public Health. 2021 Apr 29;18(9):4734. doi: 10.3390/ijerph18094734 (PMC8124131; doi:10.3390/ijerph18094734)
Supplement: Supplementary file 1 [file ijerph-18-04734-s001.zip › ijerph-1187255-SI.pdf]

# Assessment of Good Practices in Community-based Interventions for Physical Activity Promotion: Development of a user-friendly tool

Sofia Franco, Cristina Godinho, Catarina Santos Silva, Bruno Avelar Rosa, Rute Santos, Romeu Mendes, Marlene Nunes Silva

## Supplementary Material

### Good Practice Characteristics Appraisal Tool - Questionnaire

#### Questions about main intervention characteristics

1. Was the intervention based on any existing scientific evidence or theory?

*Example: intervention was based on scientific evidence demonstrating the benefits of physical activity; intervention is based on self-determination theory*

2. What is the target population for the intervention? Please justify this choice.

*Example: intervention focused on promoting physical activity among men, as they are a population group usually discriminated in this type of intervention*

3. Was equity in access to the intervention and throughout participation ensured?

*Example: no one who was interested in the intervention and met the characteristics of the target population was denied participation*

4. What behaviour/s is/are to be changed or acquired through participation in the intervention?

*Example: increasing number of steps per day; reducing sedentary time by 1h a day; increasing number of days per week doing physical activity*

5. Does the intervention present a comprehensive approach to health promotion, regarding individual, social and environmental factors?

Comprehensive health promotion approach - a strategy used for health promotion that develops individual competencies, creates supportive environments and positive relationships, and seeks to increase community involvement in these actions

*Example: intervention includes group sessions that promote not only individual skills, but also the relationship with other participants and professionals involved, seeking to involve the whole community*

6. How many, for how long and where are the sessions or contacts with the participants? What is the total duration of the intervention?

*Example: intervention lasts for 3 months, with 12 sessions lasting 1h30 each, once a week, held in the local sports center*

7. How are the contents or sessions of the intervention presented?

*Example: in groups or individually; face-to-face or digitally*

8. Which themes or contents are covered in each session or module of the intervention? Please justify this choice.

*Example: 3 sessions are on the importance of physical activity and 3 sessions are on healthy eating, since the aim of the intervention is to promote an increased level of physical activity and to promote better food choices*

9. Is there a manual or protocol to support implementation of the intervention?

*Example: manual to support the practitioners implementing the sessions with a description of the intervention protocols*

10. What is/are the behavioral change technique/s used in the intervention? Please justify this choice.

Behavioral change technique - active component of an intervention based on behavioral change

*Example: goal setting strategies; giving feedback; ensure social support; use of a pedometer for self-monitoring the number of steps per day*

11. An informed consent form was given to participants, prior to participation?

*Example: clear description of intervention objectives, explanation of benefits and potential adverse effects was ensured*

12. What qualifications or competences should the practitioners involved in the intervention have?

*Example: degree in exercise and health; training in behavioral change techniques*

### **Questions about monitoring and evaluation strategies**

1. Have the total financial costs necessary to deliver the intervention been calculated, including the cost per participant? If so, please specify.

*Example: 12500€ per year, with 120€ per year spent on each participant*

2. Has a cost-effectiveness analysis been carried out? If so, please specify.

Cost-effectiveness analysis - economic analysis that compares the relative costs and outcomes/effects of one or more interventions and aims to minimize the costs of achieving a specific objective; it is expressed by the ratio of a measure of 'improved health' (e.g., years of life gained, days free of illness) to the costs associated with that measure

*Example: how much did it cost to reduce the participants' systolic blood pressure by 10mmHg*

3. What indicator/s or measure/s are used in the process evaluation?

Process indicators - factors that affect or reflect how an intervention was designed or implemented

*Example: number of sessions given; barriers or enabling factors to intervention implementation*

4. What indicator/s or measure/s are used in the outcome evaluation?

Outcome indicators - factors that indicate exactly what to measure, to understand whether the objectives/outcomes have been achieved

*Example: participation increased number of steps per day by 1500 and reduced sedentary time by 60 minutes per week*

5. Which evaluation method/s or instrument/s was/were used? Please justify this choice.

*Example: pedometer; accelerometer; scale*

6. How many assessment/evaluation moments existed? Please specify when these took place.

*Example: 3 evaluation moments - at the beginning, middle and end of the intervention*

7. Is there a follow-up or sustained evaluation of participants? Please specify when these took place.

*Example: participants were evaluated 3 months after the intervention ended; intervention is cyclical, and participants are evaluated every 6 months*

8. Were the recruitment strategies used reported on? If so, what was their reach?

*Example: recruitment of participants by email or phone; report of the type of population that recruitment attracted*

9. Were participation and dropout rates, at the various evaluation moments, assessed? If so, were they reported?

*Example: 95% participation rate and 5% dropout at first assessment and 80% participation rate and 20% dropout at last assessment*

10. Was an assessment of the participants' satisfaction with the intervention carried out? If so, was it reported?

*Example: a questionnaire was given to participants about their satisfaction with the contents of the intervention and the performance of the practitioners involved*

11. Was there any monitoring of unintended outcomes of the intervention? If so, were they reported?

*Example: case of a participant who developed an eating disorder after attending healthy eating promotion sessions*

12. Was there any monitoring of the consistency/fidelity or changes made to the intervention protocol? If so, were any changes made? Which ones?

*Example: practitioners supervised the sessions, reporting that in a certain location they were unable to do a planned outdoor activity due to weather conditions*

13. Has the magnitude of effects (effect sizes) been calculated? If so, please specify.

Effect sizes - a measure that compares the magnitude of the difference in the results obtained in different intervention groups or the magnitude of the association between two or more variables

*Example: there were significant differences in the weight of participants after their involvement in the intervention*

14. Was the intervention effective? That is, did the evaluation results meet the previously established intervention objectives and goals? If so, were they reported?

*Example: participants increased the number of steps per day by 1000, not 1500, therefore targets were not met*

15. Was there any monitoring of negative consequences and outcomes of participation in the intervention? If so, were they reported?

*Example: potential risk of injury after participation in a physical activity session*

### **Questions about implementation strategies**

1. Was there training in specific aspects of implementation for the practitioners involved in the intervention?

*Example: short course for the practitioners who will implement the intervention on the content of the sessions and the activities they should teach*

2. What human and material resources are necessary to implement the intervention? Please specify them.

*Example: use of 1 multisport center, 3 fitness balls, 3 elastic bands, 1 blood pressure machine, 1 scale, 4 practitioners and 1 nurse*

3. Were previously existing resources used or integrated into the implementation?

*Example: use of the exercise room of a local gym*

4. Were the organizational structures clearly described and defined (i.e., workflow, tasks and responsibilities of each party involved in the intervention)?

*Example: Municipal Council funds the intervention which takes place in the sports center of a school, but who organizes recruitment of participants is the local health care center*

5. Were there multidisciplinary and intersectoral partnerships established for the development and implementation of the intervention? If so, which ones?

*Example: universities, schools, municipalities, social institutions, private companies*

6. Has a strategy been defined to keep the intervention running in the long term? If so, please describe it.

*Example: existence of institutional support; support from stakeholders and partners; integration into larger scale action plans; alignment with strategic guidelines and policies*

7. Was the transferability of the intervention to other populations or contexts assessed? If so, in what way will this transfer be possible?

*Example: possibility of the intervention being carried out in another part of the country, taking into account political, social and economic conditions*
